# Supplementary material
Source: publisher figshare collection journal article supplement (https://tandf.figshare.com/ndownloader/files/16131275)
Supplement: Supplementary file 1 [file 16131275]

Table S4. Quality assurance and quality control - Results of Proficiency testing (PT).

| PT | Instrument | Pb | | | Cd | | |
| --- | --- | --- | --- | --- | --- | --- | --- |
| Assigned value (µg/kg) | Lab result (µg/kg) | z-score | Assigned value (µg/kg) | Lab result (µg/kg) | z-score |
| EURL - NRL |  |  |  |  |  |  |  |
| 2011 IMEP – 33 Milk Powder | ICP-MS | 6,50 | <10 |  | 11,76 | 13,3 | 0,6 |
| 2013 IMEP – 116 Mushrooms | ICP-MS | 267 | 211 | -1,0 | 4210 | 3720 | -1,2 |
| 2014 IMEP – 118 Canned Food | ICP-MS | 116 | 110 | -0,22 | 192 | 190 | -0,05 |
| 2015 HM – 20 Chocolate | ICP-MS | 27,0 | 26,5 | -0,09 | 303 | 288 | -0,27 |
| 2016 HM – 22 Fish | ICP-MS | 12 | <20 |  | 49,0 | 40,8 | -0,76 |
| 2017 HM – 24 Herbal Supplement | ICP-MS | 930 | 810 | -0,76 | 346 | 330 | -0,46 |
| 2018 MN PT – 02 Chili Powder | ICP-MS | 878 | 910 | 0,23 | 401 | 360 | -0,56 |
| FAPAS |  |  |  |  |  |  |  |
| 2011 07148 Soya Flour | ICP-MS | 375 | 380 | 0,1 | 235 | 218 | -0,4 |
| 2011 07152 Vegetable Puree | ICP-MS | 181 | 166 | -0,4 | 137 | 122 | -0,5 |
| 2011 07154 Milk Powder | ICP-MS | 67,4 | 68,2 | 0,1 | 15,8 | 15,6 | -0,1 |
| 2011 07157 Tomato Paste | ICP-MS | 199 | 209 | 0,3 | 111 | 109 | -0,1 |
| 2011 07160 Canned Crab Meat | ICP-MS | 90,3 | 77,5 | -0,6 | 5600 | 5580 | 0,0 |
| 2011 07164 Canned Fish | ICP-MS |  |  |  | 23,4 | 20,9 | -0,5 |
| 2012 07165 Infant Cereal | ICP-MS | 75,1 | 74,7 | 0,0 | 56,6 | 48,9 | -0,6 |
| 2012 07170 Vegetable Puree | ICP-MS | 126 | 132 | 0,2 | 99,2 | 92,3 | -0,3 |
| 2012 07172 Milk Powder | ICP-MS | 66,17 | 61,8 | -0,3 | 18,59 | 16,1 | -0,6 |
| 2012 07173 Soft Drink | ICP-MS |  |  |  | 116 | 109 | -0,3 |
| 2012 07175 Tomato Paste | ICP-MS | 257 | 252 | -0,1 | 142 | 127 | -0,5 |
| 2012 07176 Chilli Powder | ICP-MS | 766 | 744 | -0,2 | 661 | 629 | -0,3 |
| 2013 07183 Infant Cereal | ICP-MS | 66,4 | 60,6 | -0,4 | 47,7 | 45,3 | -0,2 |
| 2013 07184 Soya Flour | ICP-MS | 748 | 741 | -0,1 | 495 | 413 | -0,9 |
| 2013 07190 Milk Powder | ICP-MS | 50,8 | 56,7 | 0,5 | 16,2 | 17,2 | 0,3 |
| 2013 07192 Canned Crab Meat | ICP-MS | 49,09 | 50,2 | 0,1 | 5620 | 5550 | -0,1 |
| 2013 07202 Infant Cereal | ICP-MS | 35,5 | 33,5 | -0,3 | 29,4 | 30,0 | 0,1 |
| 2014 07203 Canned Fish | ET-AAS |  |  |  | 7,85 | 7,80 | 0,0 |
| 2014 07204 Soya Flour | ICP-MS | 607 | 711 | 1.0 | 457 | 441 | -0,2 |
| 2014 07207 Vegetable Puree | ET-AAS | 212 | 207 | -0.1 | 319 | 320 | 0,0 |
| 2014 07210 Grapefruit | ICP-MS | 311 | 328 | 0.3 | 169 | 162 | -0,2 |
| 2014 07211 Milk Powder | ICP-MS | 47.5 | 47.6 | 0.0 | 12,2 | 12,7 | 0,2 |
| 2014 07213 Canned crab meat | ET-AAS | 50.1 | 49.5 | -0.1 | 5530 | 5620 | 0,1 |
| 2014 07214 Tomato Paste | ICP-MS | 325 | 390 | 1.1 | 190 | 187 | -0,1 |
| 2014 07215 Canned Fish | ICP-MS |  |  |  | 4,88 | 7,0 | 2,0 |
| 2014 07219 Powdered Rice | ICP-MS | 51.8 | 50.9 | -0.1 | 28,6 | 31,7 | 0,5 |
| 2014 07220 Edible Oil | ICP-MS | 332 | 343 | 0.2 |  |  |  |
| 2014 07223 Infant Cereal | ICP-MS | 35.1 | 33.9 | -0.2 | 39,0 | 36,6 | -0,3 |
| 2015 07226 Soya Flour | ICP-MS | 531 | 505 | -0.3 | 469 | 494 | 0,3 |
| 2015 07227 Fruit Juice | ICP-MS | 292 | 298 | 0.1 | 229 | 227 | 0,0 |
| 2015 07229 Vegetable Puree | ICP-MS | 252 | 271 | 0.4 | 192 | 210 | 0,5 |
| 2015 07232 Grapefruit | ICP-MS | 236 | 262 | 0.6 | 188 | 188 | 0,0 |
| 2015 07233 Milk Powder | ICP-MS | 86.5 | 90.0 | 0.2 | 21,3 | 22,5 | 0,3 |
| 2015 07235 Canned Crab Meat | ET-AAS | 45.2 | 49.0 | 0.4 | 7640 | 7310 | -0,4 |
| 2015 07235 Canned Crab Meat | ICP-MS | 45.2 | 42.2 | -0.3 | 7640 | 7100 | -0,6 |
| 2015 07236 Tomato paste | ET-AAS | 322 | 472 | 2.4 | 126 | 145 | 0,7 |
| 2015 07238 Infant Formula | ICP-MS |  |  |  | 14,7 | 18,3 | 1,1 |
| 2015 07241 Powdered Brown Rice | ICP-MS | 34.4 | 37.2 | 0.4 | 24,8 | 27,2 | 0,4 |
| 2015 07242 Edible Oil | ICP-MS | 394 | 413 | 0.3 |  |  |  |
| 2015 07245 Infant Cereal | ICP-MS | 66.5 | 65.8 | 0.0 | 55,2 | 53,1 | -0,2 |
| 2016 07247 Canned Fish | ICP-MS |  |  |  | 9,77 | 10,0 | 0,1 |
| 2016 07251 Vegetable Puree | ICP-MS | 245 | 202 | -0.9 | 242 | 238 | -0,1 |
| 2016 07251 Vegetable Puree | ET-AAS | 245 | 215 | -0.6 | 242 | 240 | 0,0 |
| 2016 07252 Powdered Rice | ICP-MS | 196 | 206 | 0.3 | 254 | 246 | -0,2 |
| 2016 07254 Grapefruit | ICP-MS | 247 | 239 | -0.2 | 144 | 141 | -0,1 |
| 2016 07254 Grapefruit | ET-AAS | 247 | 240 | -0.2 | 144 | 151 | 0,2 |
| 2016 07264 Powdered Brown Rice | ICP-MS | 38.6 | 40.4 | 0.2 | 33,7 | 29,9 | -0,5 |
| 2016 07267 Canned Fish | ET-AAS |  |  |  | 50,6 | 46,4 | -0,4 |
| 2016 07269 Infant Cereal | ICP-MS | 56.5 | 52.0 | -0.4 | 41,4 | 41,2 | 0,0 |
| 2016 07269 Infant Cereal | ET-AAS | 56.5 | 54.3 | -0.2 | 41,4 | 42,0 | 0,1 |
| 2016 07270 Fruit juice | ET-AAS | 207 | 205 | 0.0 | 193 | 175 | -0,5 |
| 2016 07272 Vegetable puree | ET-AAS | 205 | 201 | -0.1 | 289 | 290 | 0,0 |
| 2017 07289 Powdered Brown Rice | ICP-MS | 33.7 | 36.3 | 0.3 | 25,0 | 25,3 | 0,1 |
| 2017 07294 Infant Cereal | ICP-MS | 35.2 | 38.7 | 0.5 | 15,7 | 14,5 | -0,4 |
| 2017 07297 Vegetable Puree | ET-AAS | 308 | 310 | 0.0 | 486 | 480 | -0,1 |
| 2018 07301 Milk Powder | ET-AAS | 70.6 | 75.5 | 0.3 | 24,8 | 25,8 | 0,2 |
| 2018 07301 Milk Powder | ICP-MS | 70.6 | 75.6 | 0.3 | 24,8 | 26,3 | 0,3 |
| 2018 07303 Canned Crab Meat | ET-AAS | 52.6 | 48.5 | -0.4 | 6210 | 6480 | 0,4 |
| 2018 07306 Grapefruit Puree | ET-AAS | 147 | 164 | 0.5 | 92,8 | 96,8 | 0,2 |
| 2018 07306 Grapefruit Puree | ICP-MS | 147 | 172 | 0.8 | 92,8 | 93,5 | 0,0 |
| 2018 07308 Infant Formula | ICP-MS |  |  |  | 24,9 | 20,7 | -0,8 |
| 2018 07314 Powdered Brown Rice | ICP-MS | 45.6 | 44.0 | -0.2 | 34,0 | 32,1 | -0,3 |
| 2018 07320 Infant Cereal | ICP-MS | 32.4 | 29.6 | -0.4 | 15,1 | 16,7 | 0,5 |
| 2019 07326 Food Supplement | ICP-MS | 41.6 | 48.0 | 0.7 | 45,3 | 43,2 | -0,2 |
| 2019 07327 Milk Powder | ICP-MS | 76.3 | 90.5 | 0.8 | 30,0 | 31,9 | 0,3 |
